# Supplementary material for: Crystal Structure of an (R)-Selective ω-Transaminase from Aspergillus terreus
Source: PubMed Central journal article supplement (PMC3907554; doi:10.1371/journal.pone.0087350), 2014-01-30
Supplement: pone.0087350.s001.pdf [file pone.0087350.s001.pdf]

## SUPPLEMENTAL INFORMATION

### Crystal structure of an (*R*)-selective ω-transaminase from *Aspergillus terreus*

Andrzej Łyskowi<sup>1\*</sup>, Christian Gruber<sup>1</sup>, Georg Steinkellner<sup>1</sup>, Martin Schürmann<sup>2</sup>,  
Helmut Schwab<sup>1,3</sup>, Karl Gruber<sup>1,4</sup>, Kerstin Steiner<sup>1\*</sup>

**Table S1. Sequences of primers** used for cloning and mutagenesis in this study. Sequences of restriction sites are underlined, start and stop codon are indicated with boxes and mutated bases are highlighted in bold letters.

| Primer name (mutation)         | Sequence                                           |
|--------------------------------|----------------------------------------------------|
| AT-ωTA_for( <i>Nco</i> I)      | AATCACC <u>ATG</u> GCGTCTATGGACAAAGTATTCGC         |
| AT-ωTA_rev( <i>Xho</i> I-Stop) | AATCACTCGAGATTACGTTTCGTTGTAGTCGATTTCAAGG           |
| AT-ωTA_for( <i>Nde</i> I)      | AATCACAT <u>ATG</u> GCGTCTATGGACAAAGTATTCGC        |
| AT-ωTA_rev( <i>Hind</i> III)   | AATCAAAGCTTA <u>TTA</u> ATTACGTTTCGTTGTAGTCGATTTTC |
| AT-ωTA-Y60A_for                | GCACTCTGACCTGACTGCAGACGTTCCGTCTGTATG               |
| AT-ωTA-Y60A_rev                | CATACAGACGGAACGTCT <b>GC</b> AGTCAGGTCAGAGTGC      |
| AT-ωTA-Y60F_for                | CTCTGACCTGACTT <b>TC</b> GACGTTCCGTCTG             |
| AT-ωTA-Y60F_rev                | CAGACGGAACGT <b>CG</b> AAAGTCAGGTCAGAG             |
| AT-ωTA-R128A_for               | GTCTGAAAGGCGTT <b>GCT</b> GGTACTCGTCCG             |
| AT-ωTA-R128A_rev               | CGGACGAGTACCAGCAACGCCTTTTCAGAC                     |
| AT-ωTA-W184A_for               | GTAAAAACCTGCAG <b>GCG</b> GGCGACCTGGTTC            |
| AT-ωTA-W184A_rev               | GAACCAGGTCG <b>CCCG</b> CCTGCAGGTTTTTAAC           |
| AT-ωTA-W184F_for               | GTAAAAACCTGCAGT <b>TCG</b> GCGACCTGGTTCGTG         |
| AT-ωTA-W184F_rev               | CACGAACCAGGTCG <b>CCG</b> AACTGCAGGTTTTTAAC        |

**Table S2. (Conserved) amino acids within a 12 Å range from the cofactor PLP in AT- $\omega$ TA.**

| distance [Å] | chain | residue | conserved |
|--------------|-------|---------|-----------|
| 4            | A     | THR-59  | *         |
| 4            | A     | TYR-60  | *         |
| 4            | A     | ARG-79  | *         |
| 4            | A     | SER-83  | *         |
| 4            | A     | THR-178 |           |
| 4            | A     | VAL-179 |           |
| 4            | A     | LYS-180 |           |
| 4            | A     | ASN-181 |           |
| 4            | A     | TRP-184 |           |
| 4            | A     | GLU-213 | *         |
| 4            | A     | GLY-214 | *         |
| 4            | A     | GLY-216 | *         |
| 4            | A     | PHE-217 | *         |
| 4            | A     | ASN-218 | *         |
| 4            | A     | LEU-235 |           |
| 4            | A     | GLY-237 |           |
| 4            | A     | VAL-238 | *         |
| 4            | A     | THR-239 | *         |
| 4            | A     | THR-274 | *         |
| 4            | A     | THR-275 | *         |
| 6            | A     | LEU-58  | *         |
| 6            | A     | ASP-61  | *         |
| 6            | A     | VAL-62  | *         |
| 6            | A     | HIS-76  | *         |
| 6            | A     | LEU-87  | *         |
| 6            | A     | ARG-169 |           |
| 6            | A     | ASP-176 |           |
| 6            | A     | PRO-177 |           |
| 6            | A     | LEU-182 |           |
| 6            | A     | LEU-187 |           |
| 6            | A     | SER-215 | *         |
| 6            | A     | GLN-236 |           |
| 6            | A     | ARG-240 | *         |
| 6            | A     | CYS-273 | *         |
| 6            | A     | ALA-276 | *         |
| 8            | A     | PRO-63  | *         |
| 8            | A     | SER-64  | *         |
| 8            | A     | LEU-80  | *         |
| 8            | A     | ALA-82  | *         |
| 8            | A     | CYS-84  | *         |
| 8            | A     | LYS-86  | *         |
| 8            | A     | PHE-115 | *         |

|    |   |         |   |
|----|---|---------|---|
| 8  | A | GLU-117 | * |
| 8  | A | LEU-118 | * |
| 8  | A | VAL-120 | * |
| 8  | A | VAL-149 |   |
| 8  | A | ILE-175 |   |
| 8  | A | GLN-183 |   |
| 8  | A | ASP-186 |   |
| 8  | A | THR-212 | * |
| 8  | A | ILE-219 | * |
| 8  | A | GLY-233 |   |
| 8  | A | VAL-234 |   |
| 8  | A | LYS-241 | * |
| 8  | A | SER-242 | * |
| 8  | A | GLY-277 |   |
| 8  | A | GLY-278 | * |
| 8  | A | MET-280 | * |
| 8  | A | TYR-306 |   |
| 8  | B | HIS-55  |   |
| 12 | A | GLY-52  |   |
| 12 | A | HIS-55  |   |
| 12 | A | SER-56  | * |
| 12 | A | ASP-57  |   |
| 12 | A | VAL-65  | * |
| 12 | A | PHE-71  | * |
| 12 | A | ARG-72  | * |
| 12 | A | LEU-73  | * |
| 12 | A | ASP-74  | * |
| 12 | A | ASP-75  | * |
| 12 | A | ILE-77  | * |
| 12 | A | THR-78  | * |
| 12 | A | GLU-81  | * |
| 12 | A | THR-85  | * |
| 12 | A | ARG-88  | * |
| 12 | A | LEU-89  |   |
| 12 | A | ALA-114 | * |
| 12 | A | VAL-116 | * |
| 12 | A | ILE-119 | * |
| 12 | A | THR-121 | * |
| 12 | A | ARG-122 | * |
| 12 | A | ASN-138 | * |
| 12 | A | TYR-140 | * |
| 12 | A | PHE-142 | * |
| 12 | A | GLN-144 | * |
| 12 | A | TYR-146 |   |

|     |   |         |         |
|-----|---|---------|---------|
| 12  | A | VAL-147 |         |
| 12  | A | TRP-148 |         |
| 12  | A | MET-150 |         |
| 12  | A | ARG-168 |         |
| 12  | A | VAL-170 |         |
| 12  | A | PRO-171 |         |
| 12  | A | PRO-172 |         |
| 12  | A | ALA-174 |         |
| 12  | A | GLY-185 |         |
| 12  | A | VAL-188 |         |
| 12  | A | ARG-189 |         |
| 12  | A | GLY-190 |         |
| 12  | A | MET-191 |         |
| 12  | A | TYR-201 | *       |
| 12  | A | PRO-202 |         |
| 12  | A | PHE-203 | *       |
| 12  | A | LEU-204 |         |
| 12  | A | THR-205 | *       |
| 12  | A | LEU-211 | *       |
| 12  | A | VAL-220 | *       |
| 12  | A | THR-229 | *       |
| 12  | A | PRO-230 | *       |
| 12  | A | ASP-231 | *       |
| 12  | A | ARG-232 |         |
| 12  | A | VAL-243 | *       |
| 12  | A | ILE-244 | *       |
| 12  | A | ASN-245 | *       |
| 12  | A | PHE-271 | *       |
| 12  | A | MET-272 | *       |
| 12  | A | ILE-279 | *       |
| 12  | A | ILE-302 |         |
| 12  | A | TRP-307 |         |
| 12  | A | MET-309 |         |
| 12  | A | HIS-310 |         |
| 12  | B | GLN-51  |         |
| 12  | B | PHE-53  |         |
| 12  | B | MET-54  |         |
| 12  | B | SER-56  | *       |
| 12  | B | ARG-128 |         |
| 12  | B | GLN-183 |         |
| 12  | B | GLY-185 |         |
| 12  | B | ARG-189 |         |
| >12 | A | -       | ASN-218 |

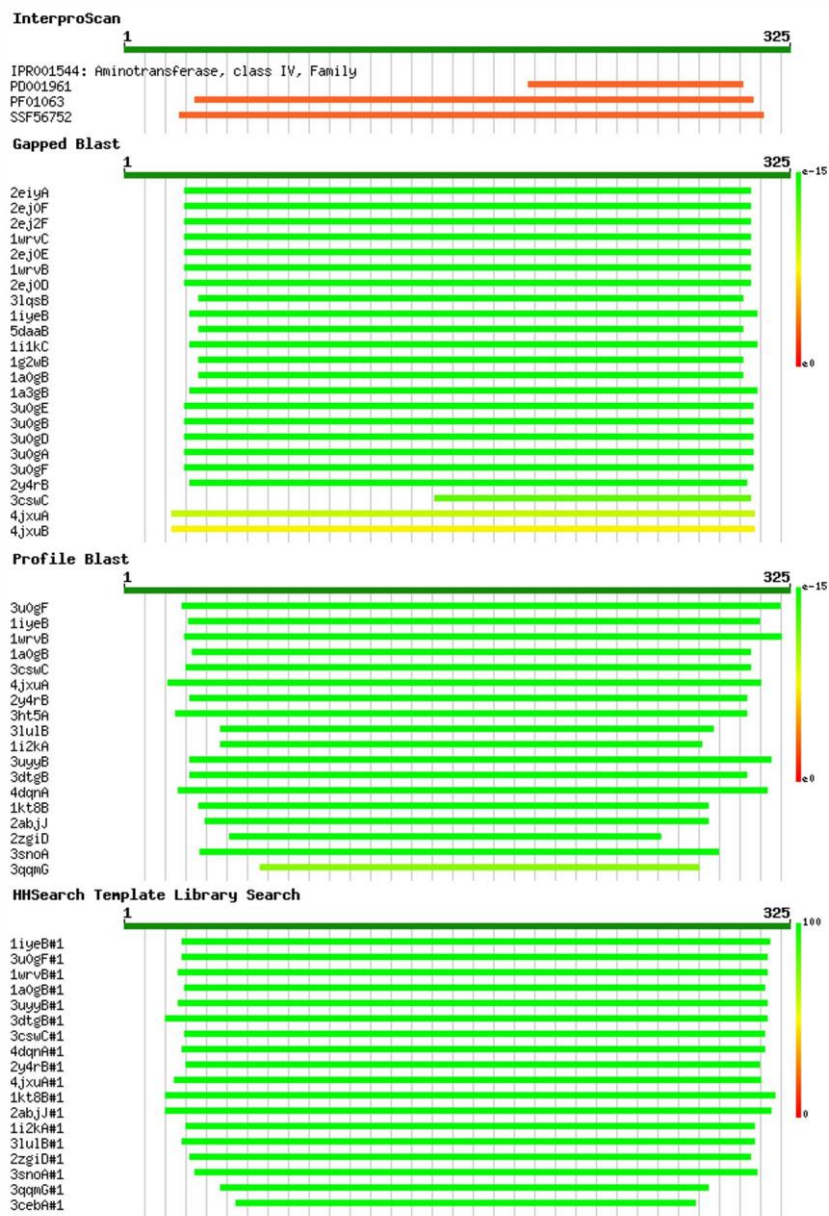

**Figure S1. Output of the Swiss-Model Template Identification module**

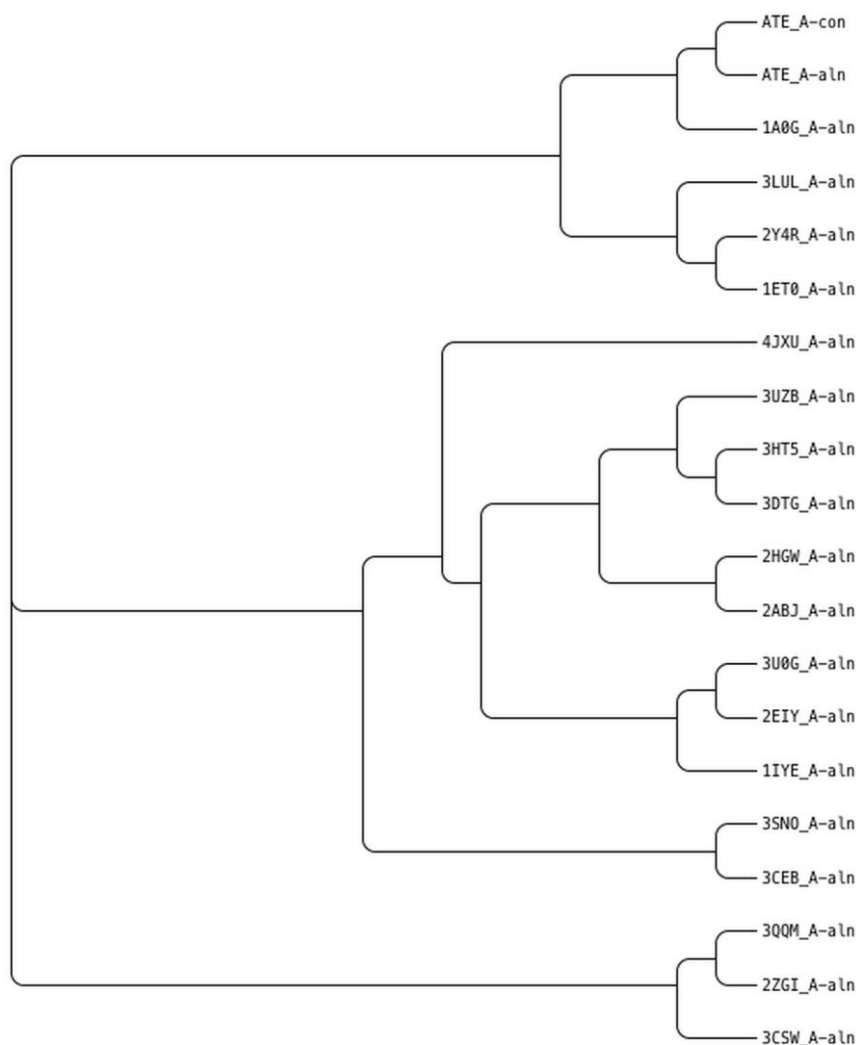

**Figure S2. Cladogram of selected fold IV aminotransferases:** AT- $\omega$ TA, D-ATA: 1A0G from *Bacillus* sp YM-1, BCATs: 1IYE from *E. coli*, 2EIY from *Thermus thermophilus*, 3HT5 from *Mycobacterium tuberculosis*, 3DTG from *Mycobacterium smegmatis*, 3UZB from *Deionococcus radiodurans*, 3U0G from *Burkholderia pseudomallei*, 2ABJ and 2HGW from human, ADCLs: 1ETO from *E. coli*, 2Y4R from *Pseudomonas aeruginosa*, and a few putative aminotransferases: 2ZGI from *Thermus thermophilus* HB8, 3CEB from *Haemophilus somnus*, 3CSW from *Thermotoga maritima*, 3LUL from *Legionella pneumophila*, 3QQM from *Mesorhizobium loti*, 3SNO from *Corynebacterium glutamicum*, 4JXU from *Sinorhizobium meliloti*.



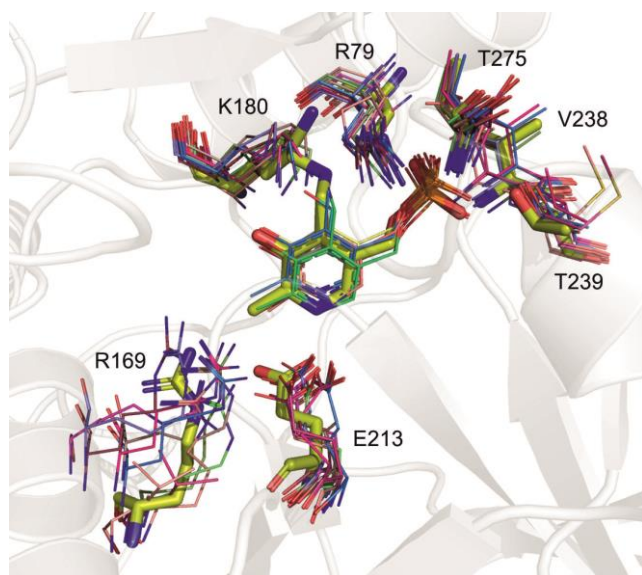

**Figure S5.** Alignment of PLP and PLP-coordinating amino acids of AT- $\omega$ TA (light green sticks) with other members of fold IV family (lines of various colours). The figure was prepared using the program PyMOL.

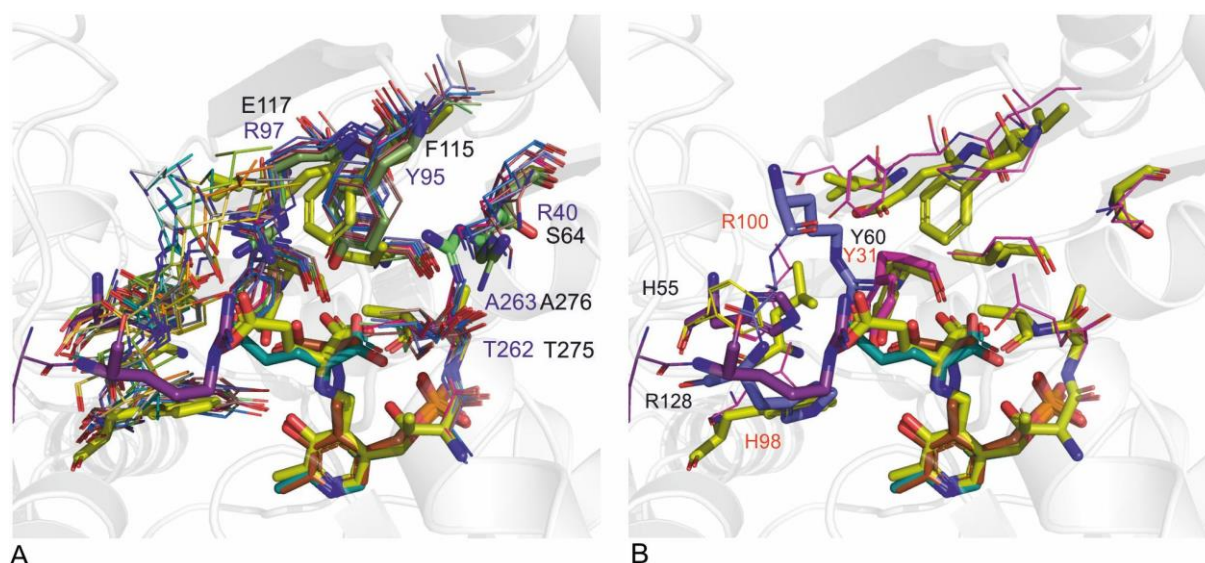

**Figure S6.** Alignment of active site amino acids of AT- $\omega$ TA with other members of the fold IV family (A: BCATs, B: D-ATA). Light green sticks: amino acids and L-Glu-aldimine of AT- $\omega$ TA, turquoise: L-Glu-aldimine bound in BCAT, brown: D-Ala-aldimine bound in D-ATA. Other amino acids depicted as sticks: conserved amino acids of either BCAT or D-ATA involved in  $\alpha$ -carboxylate binding. Labelling: black: AT- $\omega$ TA, blue: BCAT, red: D-ATA. The figures were prepared using the program PyMOL.



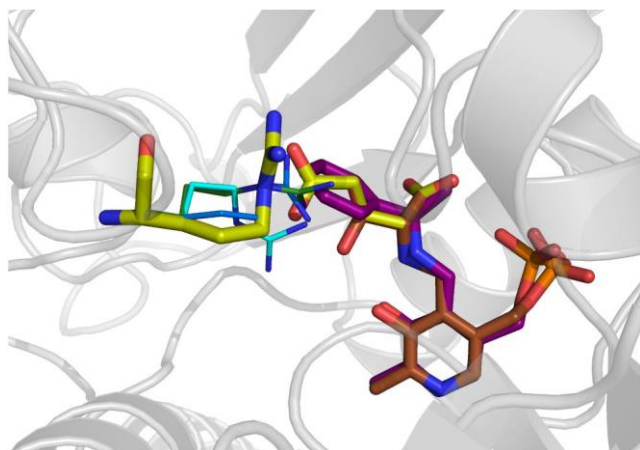

**Figure S7. Different rotamers of arginine 128 in AT- $\omega$ TA.** Grey: Cartoon depiction of the AT- $\omega$ TA backbone, light green stick depiction: original conformation of R128 in AT- $\omega$ TA; blue, turquoise and green lines: alternative rotamers that move R128 closer to the  $\alpha$ -carbonyl of a docked D-Ala-aldimine (brown) and docked acetophenone-aldimine (purple); L-glutamate-aldimine also depicted in light green. The figure was prepared using the program PyMOL.
